# Supplementary material for: Synthesis of nanosize-controllable copper and its alloys in carbon shells
Source: Royal Society of Chemistry journal article supplement (doi:10.1039/b905759e), 2009-01-01
Supplement: b905759e.pdf [file b905759e.pdf]

## Supporting Information

### Synthesis of Nanosize-controllable Copper and its Alloys in Carbon Shells

Chien-Hua Huang,<sup>a</sup> H. Paul Wang,<sup>\*a</sup> Juu-En Chang<sup>a</sup> and Edward M. Eyring<sup>b</sup>

<sup>a</sup> Department of Environmental Engineering, Sustainable Environmental Research Center, and Center for Micro/Nano Science and Technology, National Cheng Kung University, Tainan City, Taiwan. Fax: +886 6 275 2790; Tel: + 886 6 276 3608; E-mail: wanghp@mail.ncku.edu.tw

<sup>b</sup> Department of Chemistry, University of Utah, Salt Lake City, UT 84112, USA. Fax: +1 801 581 8433; Tel: +1 801 581 8658; E-mail: eyring@chem.utah.edu

\* To whom correspondence should be addressed.

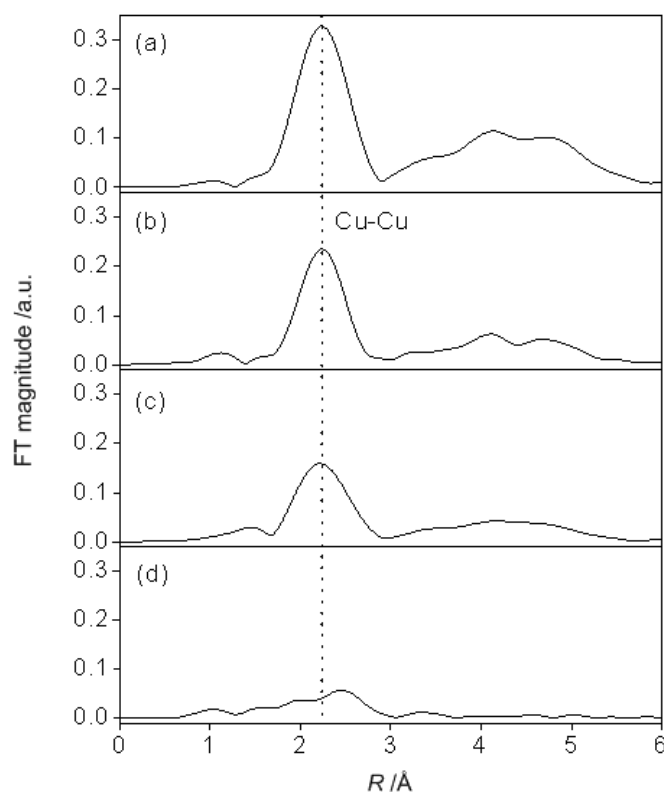

**Fig. 1** EXAFS spectra of copper in the Cu@C nanoparticles. (a) bulky Cu (CN = 12), (b) nanosize Cu (7 nm) (CN = 8), (c) bimetal Cu/Ag (1:1) (CN = 6) and (d) alloy CuPd (1:1) within the carbon shells.
